# Supplementary material
Source: publisher figshare collection journal article supplement (https://frontiersin.figshare.com/ndownloader/files/14836652)
Supplement: Supplementary file [file 14836652]

**Table S1.** The populations from the 1001 Genomes Project (Weigel, 2009) used for the STRUCTURE analyses.

| <i>name</i> | <i>Accession<br/>name</i> | <i>Country</i> | <i>Latitude</i> | <i>Longitude</i> |
|-------------|---------------------------|----------------|-----------------|------------------|
| Ved         | VED-10                    | France         | 43,74           | 3,89             |
| Lec         | LEC-25                    | France         | 43,91           | 4,14             |
| Iss         | ISS-20                    | France         | 43,92           | 3,71             |
| Mou         | MOU2-25                   | France         | 43,98           | 4,31             |
| Arr         | ARR-17                    | France         | 44,05           | 3,69             |
| Qui         | QUI-8                     | France         | 44,07           | 4,08             |
| Bez         | BEZ-9                     | France         | 44,12           | 3,77             |
| Noz         | NOZ-6                     | France         | 44,12           | 4,33             |
| Et          | Et-0                      | France         | 44,64           | 2,56             |
| Pyl         | PYL-6                     | France         | 44,65           | -1,17            |
| Ag          | Ag-0                      | France         | 45,00           | 1,30             |
| Vie         | Vie-0                     | Spain          | 42,63           | 0,76             |
| Ber         | Ber-0                     | Spain          | 42,52           | -0,56            |
| Bis         | Bis-0                     | Spain          | 42,49           | 0,54             |
| Coc         | Coc-1                     | Spain          | 42,31           | 3,19             |
| Moa         | Moa-0                     | Spain          | 42,46           | 0,70             |
| Orb         | Orb-10                    | Spain          | 42,97           | -1,23            |
| Pal         | Pal-0                     | Spain          | 42,34           | 1,30             |
| Pan         | Pan-0                     | Spain          | 42,76           | -0,23            |
| Ria         | Ria-0                     | Spain          | 42,34           | 2,17             |
| Tol         | Tol-7                     | Spain          | 42,11           | 0,60             |
| Vdm         | Vdm-0                     | Spain          | 42,04           | 1,01             |
